# Supplementary material for: Macrophage-mediated anti-tumor immunity against high-risk neuroblastoma
Source: PubMed Central journal article supplement (PMC9232393; doi:10.1038/s41435-022-00172-w), 2022-05-07
Supplement: 41435_2022_172_MOESM3_ESM.pdf [file 41435_2022_172_MOESM3_ESM.pdf]

**Table S1. Biological pathways associated with *SLAMF7* expression in high-risk neuroblastomas of Cohort 1**

| <b>Pathway</b>                                       | <b>p</b> |
|------------------------------------------------------|----------|
| Cytokine_cytokine_receptor_interaction               | 2.4e-44  |
| Osteoclast_differentiation                           | 1.4e-22  |
| Staphylococcus_aureus_infection                      | 6.4e-21  |
| Hematopoietic_cell_lineage                           | 1.4e-20  |
| Intestinal_immune_network_for_IgA_production         | 1.6e-20  |
| Rheumatoid_arthritis                                 | 1.2e-19  |
| Chemokine_signaling_pathway                          | 1.3e-19  |
| NF_kappa_B_signaling_pathway                         | 8.4e-18  |
| Leishmaniasis                                        | 2.1e-17  |
| Graft_versus_host_disease                            | 2.5e-17  |
| Antigen_processing_and_presentation                  | 2.0e-16  |
| Lysosome                                             | 4.2e-16  |
| Phagosome                                            | 1.4e-15  |
| Allograft_rejection                                  | 3.2e-15  |
| Cell_adhesion_molecules__CAMs__                      | 3.6e-15  |
| Inflammatory_bowel_disease__IBD__                    | 4.5e-15  |
| Tuberculosis                                         | 5.9e-13  |
| TNF_signaling_pathway                                | 1.4e-12  |
| Natural_killer_cell_mediated_cytotoxicity            | 2.4e-12  |
| Type_I_diabetes_mellitus                             | 1.7e-11  |
| Focal_adhesion                                       | 1.9e-11  |
| Jak_STAT_signaling_pathway                           | 3.0e-11  |
| Toxoplasmosis                                        | 5.0e-11  |
| Malaria                                              | 1.7e-10  |
| ECM_receptor_interaction                             | 3.7e-10  |
| Primary_immunodeficiency                             | 3.8e-10  |
| Amoebiasis                                           | 6.9e-10  |
| Leukocyte_transendothelial_migration                 | 7.2e-10  |
| B_cell_receptor_signaling_pathway                    | 8.3e-10  |
| Influenza_A                                          | 3.9e-09  |
| Toll_like_receptor_signaling_pathway                 | 5.5e-09  |
| Viral_myocarditis                                    | 1.2e-08  |
| Pertussis                                            | 1.6e-08  |
| AGE_RAGE_signaling_pathway_in_diabetic_complications | 1.8e-08  |
| Asthma                                               | 2.9e-08  |
| T_cell_receptor_signaling_pathway                    | 4.1e-08  |
| Platelet_activation                                  | 5.8e-08  |

|                                                            |         |
|------------------------------------------------------------|---------|
| Herpes_simplex_infection                                   | 1.5e-07 |
| Chagas_disease__American_trypanosomiasis_                  | 2.8e-07 |
| Measles                                                    | 3.6e-07 |
| HTLV_I_infection                                           | 3.7e-07 |
| NOD_like_receptor_signaling_pathway                        | 3.8e-07 |
| Salmonella_infection                                       | 6.2e-07 |
| Fc_gamma_R_mediated_phagocytosis                           | 1.7e-06 |
| Autoimmune_thyroid_disease                                 | 2.5e-06 |
| Complement_and_coagulation_cascades                        | 3.5e-06 |
| Transcriptional_misregulation_in_cancer                    | 6.2e-06 |
| PI3K_Akt_signaling_pathway                                 | 7.8e-06 |
| African_trypanosomiasis                                    | 1.1e-05 |
| Acute_myeloid_leukemia                                     | 1.3e-05 |
| Regulation_of_actin_cytoskeleton                           | 1.6e-05 |
| Legionellosis                                              | 3.4e-05 |
| Pathways_in_cancer                                         | 3.7e-05 |
| Proteoglycans_in_cancer                                    | 5.4e-05 |
| Protein_digestion_and_absorption                           | 1.4e-04 |
| Apoptosis                                                  | 1.5e-04 |
| Other_glycan_degradation                                   | 1.1e-03 |
| MAPK_signaling_pathway                                     | 1.8e-03 |
| Cytosolic_DNA_sensing_pathway                              | 1.9e-03 |
| Epstein_Barr_virus_infection                               | 1.9e-03 |
| VEGF_signaling_pathway                                     | 2.4e-03 |
| Endocytosis                                                | 3.3e-03 |
| Inflammatory_mediator_regulation_of_TRP_channels           | 3.7e-03 |
| Ras_signaling_pathway                                      | 3.9e-03 |
| Shigellosis                                                | 4.6e-03 |
| Arrhythmogenic_right_ventricular_cardiomyopathy__ARVC_     | 4.8e-03 |
| Epithelial_cell_signaling_in_Helicobacter_pylori_infection | 6.9e-03 |
| Fc_epsilon_RI_signaling_pathway                            | 6.9e-03 |
| Hepatitis_B                                                | 8.3e-03 |
| RIG_I_like_receptor_signaling_pathway                      | 9.2e-03 |
