# Supplementary material for: Macrophage-mediated anti-tumor immunity against high-risk neuroblastoma
Source: PubMed Central journal article supplement (PMC9232393; doi:10.1038/s41435-022-00172-w), 2022-05-07
Supplement: 41435_2022_172_MOESM4_ESM.pdf [file 41435_2022_172_MOESM4_ESM.pdf]

**Table S2. Biological pathways associated with *SLAMF7* expression in high-risk neuroblastomas of Cohort 2**

| <b>Pathway</b>                               | <b>p value</b> |
|----------------------------------------------|----------------|
| Cytokine_cytokine_receptor_interaction       | 4.0e-33        |
| Staphylococcus_aureus_infection              | 5.0e-27        |
| Graft_versus_host_disease                    | 1.9e-25        |
| Hematopoietic_cell_lineage                   | 1.2e-24        |
| Rheumatoid_arthritis                         | 6.0e-24        |
| Phagosome                                    | 2.0e-23        |
| Osteoclast_differentiation                   | 5.0e-23        |
| Leishmaniasis                                | 7.5e-23        |
| Cell_adhesion_molecules__CAMs__              | 2.0e-22        |
| Allograft_rejection                          | 6.5e-22        |
| Antigen_processing_and_presentation          | 9.5e-22        |
| Intestinal_immune_network_for_IgA_production | 3.0e-21        |
| NF_kappa_B_signaling_pathway                 | 4.0e-21        |
| Inflammatory_bowel_disease__IBD__            | 7.1e-20        |
| Tuberculosis                                 | 2.5e-18        |
| Natural_killer_cell_mediated_cytotoxicity    | 1.9e-16        |
| Type_I_diabetes_mellitus                     | 6.0e-16        |
| Malaria                                      | 8.4e-15        |
| Chemokine_signaling_pathway                  | 7.4e-14        |
| Influenza_A                                  | 1.4e-13        |
| Lysosome                                     | 1.5e-13        |
| Viral_myocarditis                            | 2.5e-13        |
| Autoimmune_thyroid_disease                   | 2.8e-13        |
| Toxoplasmosis                                | 2.9e-13        |
| Primary_immunodeficiency                     | 5.4e-12        |
| Asthma                                       | 1.9e-11        |
| Salmonella_infection                         | 3.6e-11        |
| Measles                                      | 4.9e-11        |
| Leukocyte_transendothelial_migration         | 1.3e-10        |
| Herpes_simplex_infection                     | 2.8e-10        |
| ECM_receptor_interaction                     | 7.7e-10        |
| TNF_signaling_pathway                        | 1.2e-09        |
| Toll_like_receptor_signaling_pathway         | 1.8e-09        |
| T_cell_receptor_signaling_pathway            | 4.2e-09        |
| Pertussis                                    | 4.8e-09        |
| HTLV_I_infection                             | 8.8e-09        |
| Focal_adhesion                               | 1.4e-08        |

|                                                            |         |
|------------------------------------------------------------|---------|
| NOD_like_receptor_signaling_pathway                        | 1.4e-08 |
| Amoebiasis                                                 | 5.8e-08 |
| Fc_gamma_R_mediated_phagocytosis                           | 8.4e-08 |
| B_cell_receptor_signaling_pathway                          | 2.7e-07 |
| Jak_STAT_signaling_pathway                                 | 4.0e-07 |
| Chagas_disease__American_trypanosomiasis_                  | 7.7e-07 |
| Complement_and_coagulation_cascades                        | 8.0e-07 |
| Legionellosis                                              | 1.1e-05 |
| AGE_RAGE_signaling_pathway_in_diabetic_complications       | 1.5e-05 |
| Transcriptional_misregulation_in_cancer                    | 1.7e-05 |
| Platelet_activation                                        | 2.0e-05 |
| Systemic_lupus_erythematosus                               | 2.2e-05 |
| African_trypanosomiasis                                    | 2.3e-05 |
| Epstein_Barr_virus_infection                               | 2.4e-05 |
| Pathogenic_Escherichia_coli_infection                      | 4.6e-05 |
| PI3K_Akt_signaling_pathway                                 | 5.1e-05 |
| Cytosolic_DNA_sensing_pathway                              | 1.1e-04 |
| Regulation_of_actin_cytoskeleton                           | 1.3e-04 |
| MAPK_signaling_pathway                                     | 2.7e-03 |
| Hepatitis_C                                                | 2.9e-03 |
| Shigellosis                                                | 2.9e-03 |
| Fc_epsilon_RI_signaling_pathway                            | 5.0e-03 |
| Pathways_in_cancer                                         | 5.3e-03 |
| Proteoglycans_in_cancer                                    | 7.5e-03 |
| Hepatitis_B                                                | 7.7e-03 |
| Epithelial_cell_signaling_in_Helicobacter_pylori_infection | 8.2e-03 |
